# Supplementary material for: Association of the patterns of use of medications with mortality of COVID-19 infection: a hospital-based observational study
Source: HighWire-hosted journal article supplement (doi:10.1136/bmjopen-2021-050051), 2021-12-01
Supplement: bmjopen-2021-050051supp001_data_supplement.pdf [file bmjopen-2021-050051supp001_data_supplement.pdf]

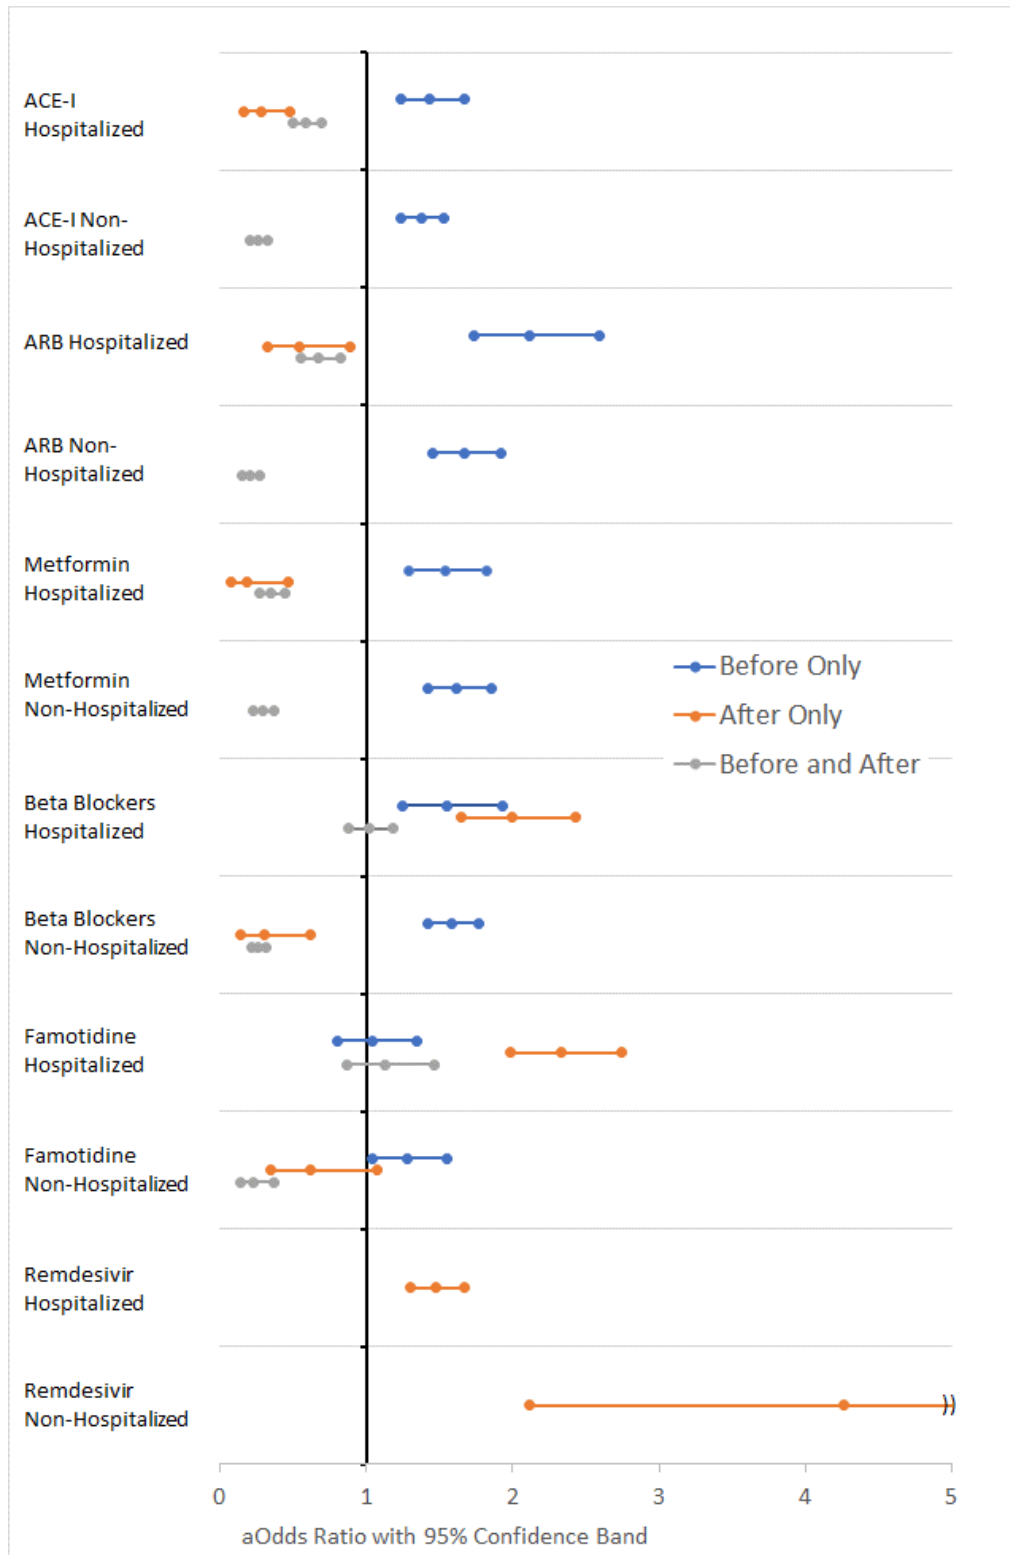

The upper 95% confidence limit for Remdesivir (95% CI 2.1 – 8.6) is truncated to enhance visualization of associations for other medications with much narrower confidence bands.
